# Supplementary material for: Patterns and driving mechanism of global marine phytoplankton blooms
Source: Research Square preprint supplement (doi:10.21203/rs.3.rs-5065614/v1), 2026-01-27
Supplement: Supplementary file 2 [file c2635e30759b22ffb736700e.pdf]

## Extended Data

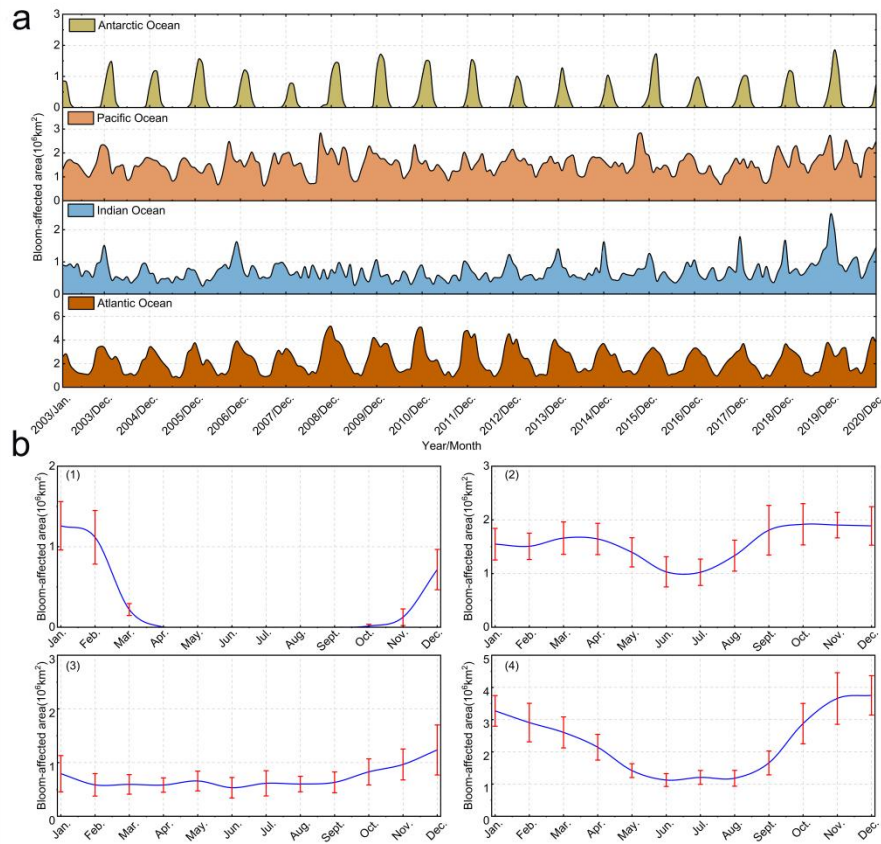

**Extended Data Fig. 1 | Monthly Trends in Algal Bloom Area in the Four Major Oceans of the Southern Hemisphere.** **a** presents the annual changing trend of BAA in the Southern Hemisphere's four main seas. The green section represents the Antarctic Ocean bloom, which is absent for most of the year. The orange section depicts the South Pacific bloom, displaying an annual multi-peak pattern. The blue section represents the South Indian Ocean bloom, which also exhibits an annual multi-peak pattern. The brown area shows the South Atlantic algal bloom, which varies annually and can have either a single- or multi-peak pattern. **b** illustrates the multi-year average monthly scale annual change trend of the algal bloom area in the four Southern Hemisphere oceans. **b (1)**, The Antarctic Ocean trend. **b (2)**, The South Pacific Ocean trend. **b (3)**, The South Indian Ocean trend. **b (4)**, The South Atlantic Ocean trend. The sample standard deviation in **b** is indicated by the red error bars. The map was created using Origin 2024.

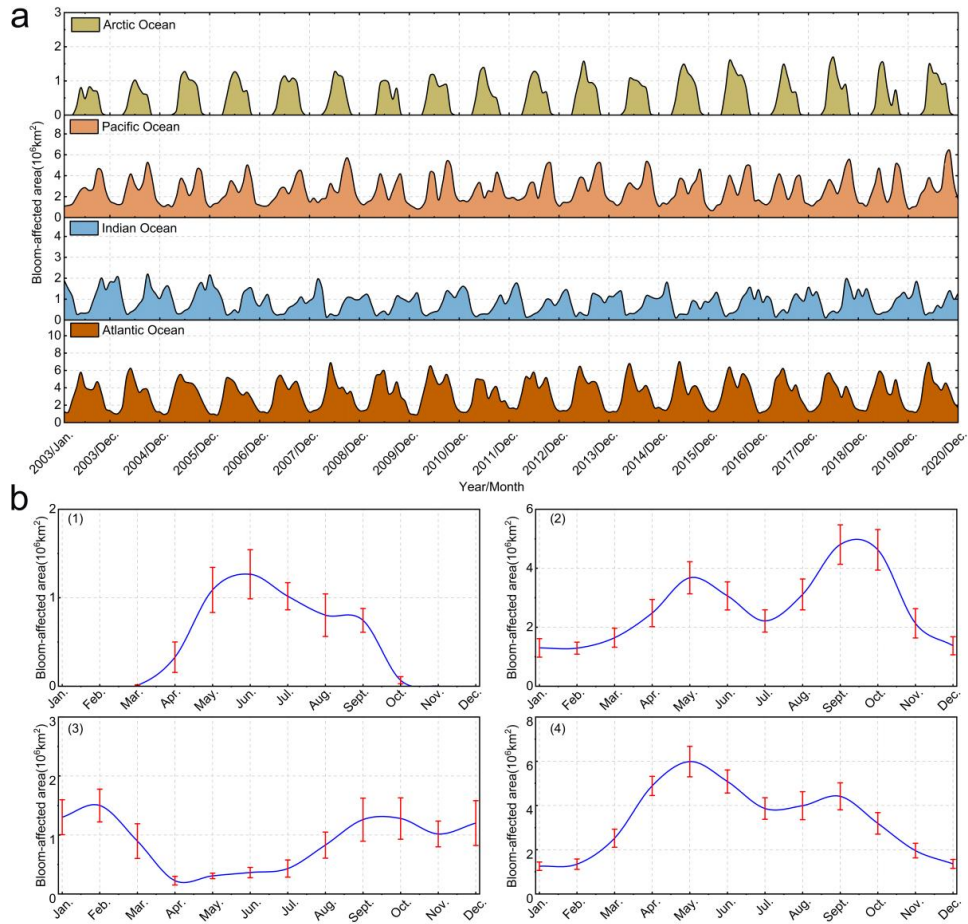

**Extended Data Fig. 2 | Monthly Trends of BAA in the Four Major Oceans of the Northern Hemisphere.** **a**, The annual changing trend in BAA across the four main seas of the Northern Hemisphere. The green area represents the Arctic Ocean bloom, which is absent during certain months. The orange area depicts the North Pacific bloom, which shows a distinct double-peak pattern annually. The blue area represents the North Indian Ocean bloom, exhibiting a multi-peak pattern each year. The brown area indicates the North Atlantic bloom, which displays a clear double-peak pattern annually. **b**, The annual trend of the multi-year average monthly scale of BAA in these oceans. **b (1)**, The Arctic Ocean trend. **b (2)**, The North Pacific Ocean trend. **b (3)**, The North Indian Ocean trend. **b (4)**, The North Atlantic Ocean trend. The red error bars in **b** indicate the sample standard deviation. The map was created using Origin 2024.

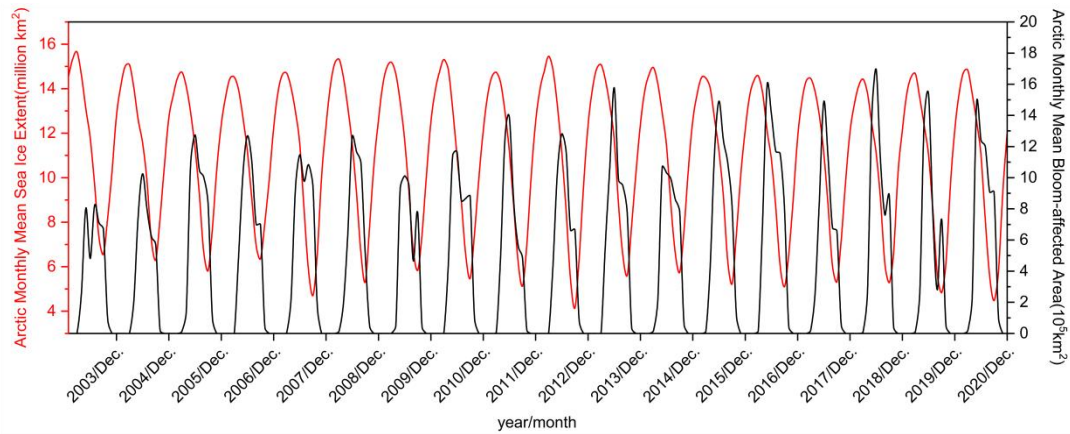

25

26 **Extended Data Fig. 3 | Monthly Trend of the BAA and Sea Ice in the Arctic Ocean.** The monthly

27 variations in the sea ice extent of the Arctic Ocean are depicted by the red line. The sea ice extent

28 reaches its maximum in March and then progressively decreases as the temperature rises, reaching its

29 minimum in September before it begins to grow again. The BAA by Arctic Ocean is represented by a

30 black line, illustrating monthly variations. The map was created using Origin 2024.

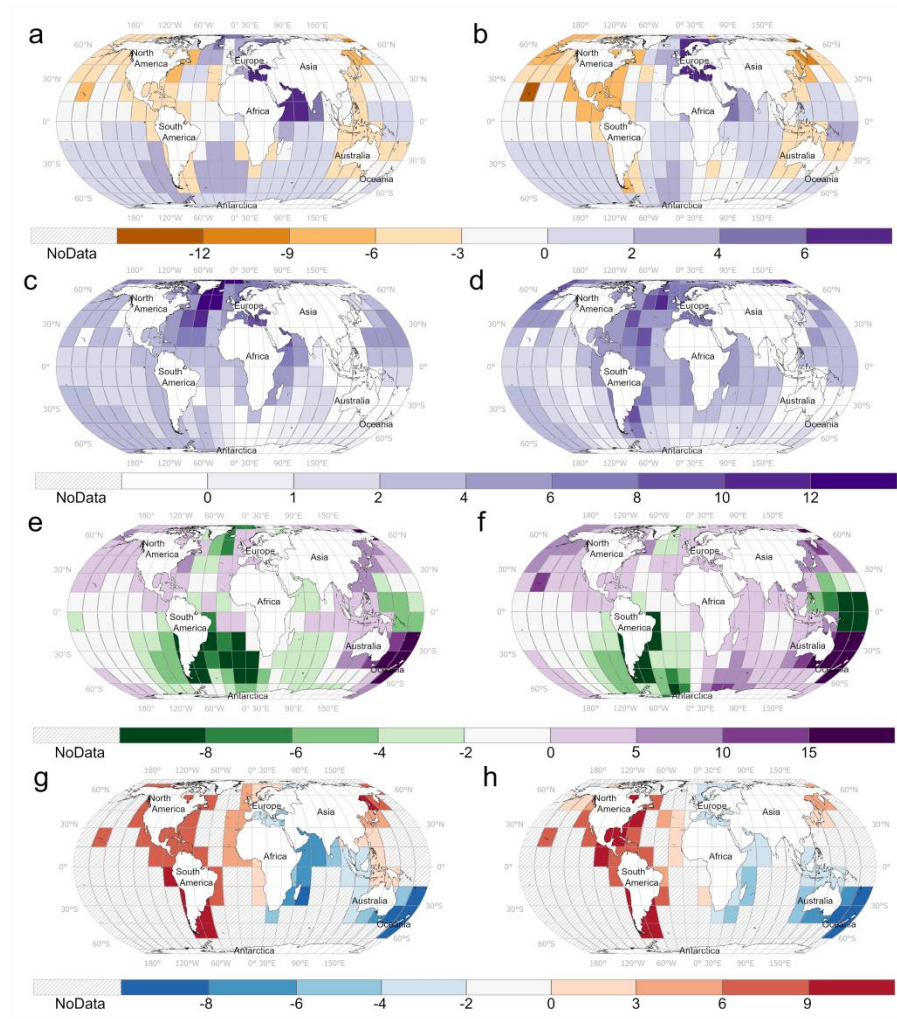

**Extended Data Fig. 4 | Spatial distribution of regression coefficients for the main influencing factors on phytoplankton bloom-affected areas. a,** Regression coefficients for daytime SST in 2003. **b,** Regression coefficients for daytime SST in 2020. **c,** Regression coefficients for nighttime wind speed in 2003. **d,** Regression coefficients for nighttime wind speed in 2020. **e,** Regression coefficients for salinity in 2003. **f,** Regression coefficients for salinity in 2020. **g,** Regression coefficients for solar radiation in 2003. **h,** Regression coefficients for solar radiation in 2020. The map was created using ArcGIS.



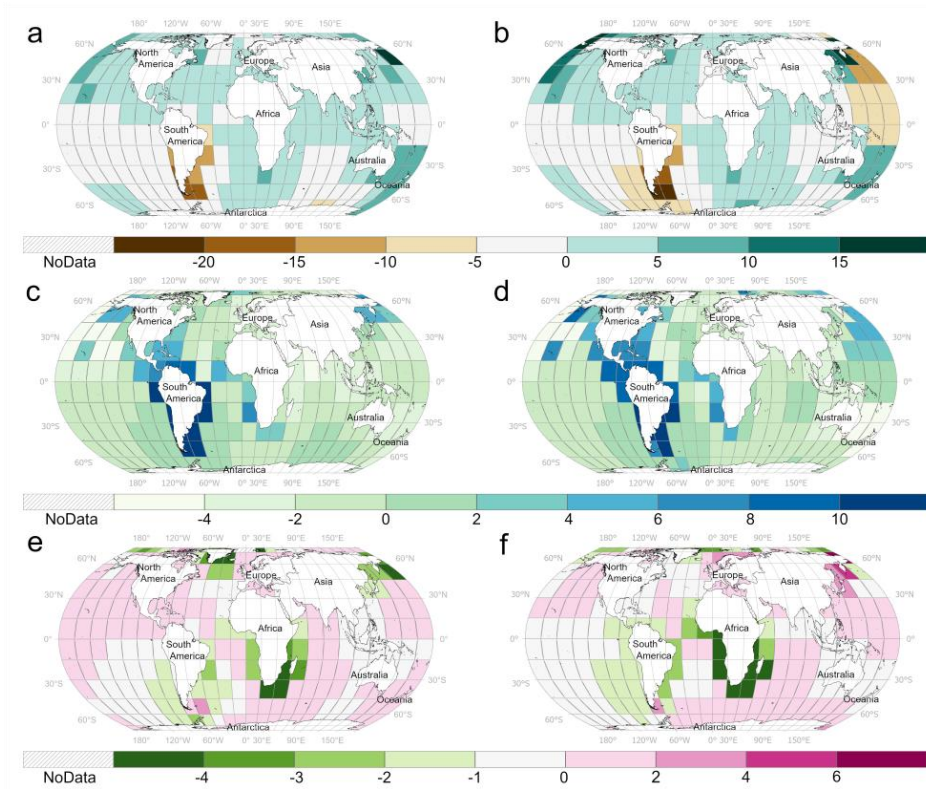

**Extended Data Fig. 5 | Spatial distribution of regression coefficients for the main influencing factors on cumulative days of phytoplankton bloom. a**, Regression coefficients for salinity in 2003. **b**, Regression coefficients for salinity in 2020. **c**, Regression coefficients for solar radiation in 2003. **d**, Regression coefficients for solar radiation in 2020. **e**, Regression coefficients for precipitation in 2003. **f**, Regression coefficients for precipitation in 2020. The map was created using ArcGIS.

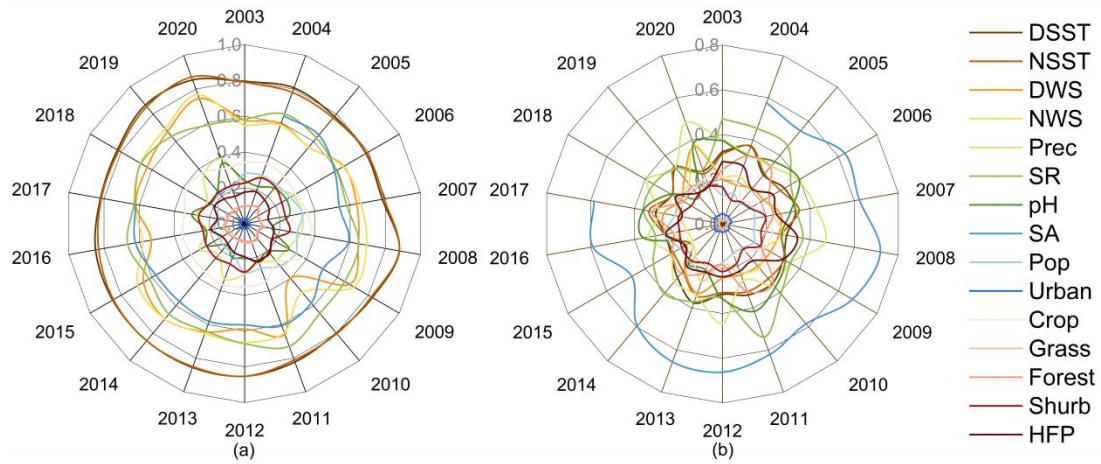

**Extended Data Fig. 6 | Contribution Degree of Each Environmental Factor to Algal Blooms.** The contribution of each environmental element to algal blooms (i.e., the q value result of the factor detection function of the geographical detector) is analyzed based on units of  $0.1^{\circ}$  latitude, with  $n=1800$ . The factor detection q-value findings for each environmental factor on the BAA are displayed in **a**, and those for CBD are displayed in **b**. Salinity and sea surface temperature have the most significant effects on both the CBD and the BAA. The map was created using Origin 2024.

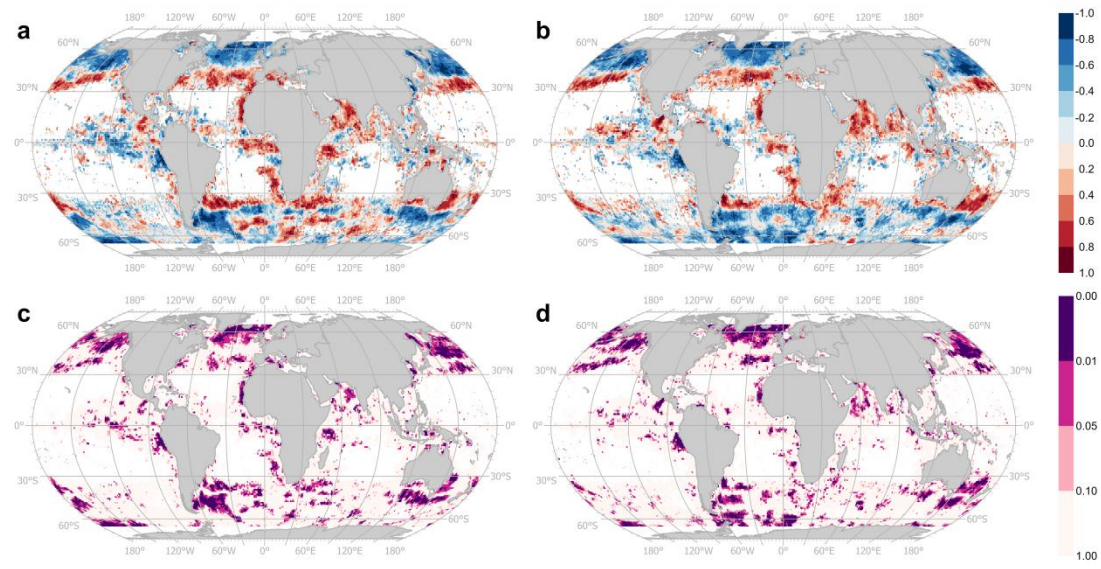

**Extended Data Fig. 7 | Correlation and Significance between Annual Monthly Average Bloom-affected areas (BAA) and Marine Nitrogen and Phosphorus Concentrations.** **a**, The correlation ( $\rho$  value) between monthly average BAA and marine nitrogen concentration. **b**, The correlation ( $\rho$  value) between monthly average BAA and marine phosphorus concentration. **c**, The significance ( $q$  value) between monthly average BAA and marine nitrogen concentration. **d**, The significance ( $q$  value) between monthly average BAA and marine phosphorus concentration. The parameters are  $n = 180 \times 360$  and  $t = 12$  months. The map was created using ArcGIS.

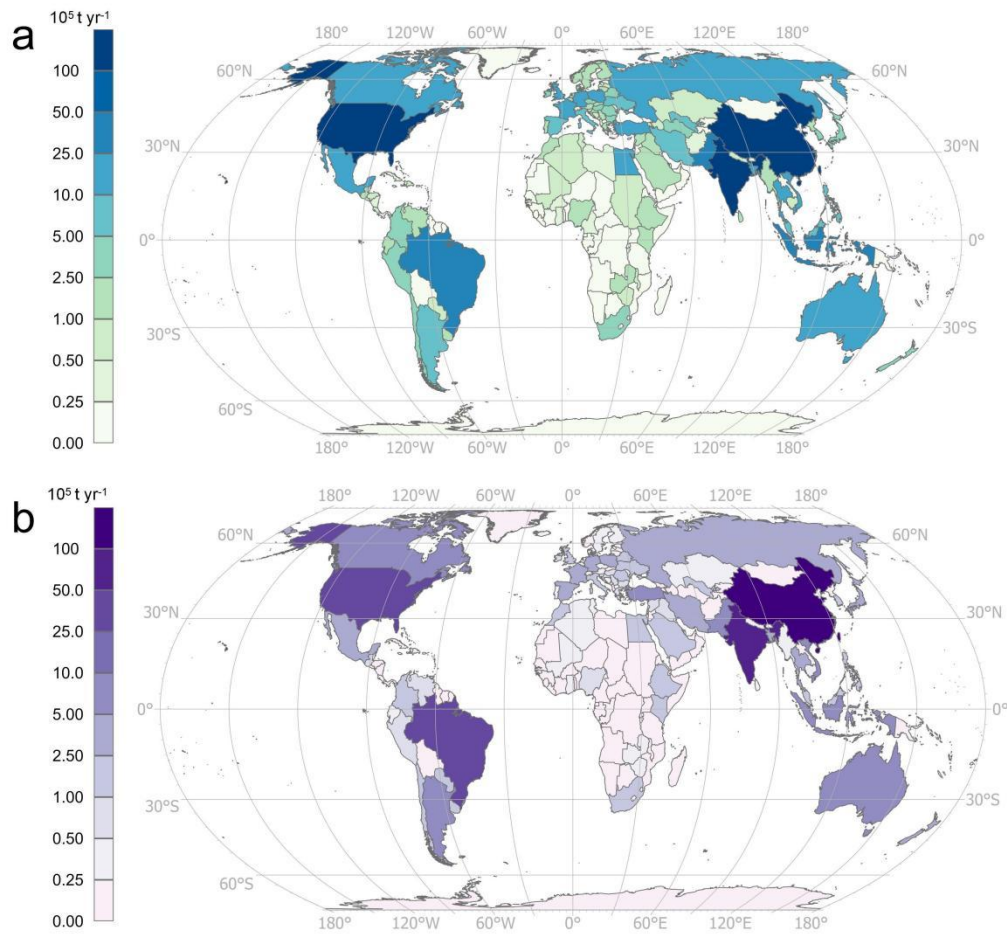

**Extended Data Fig. 8 | Annual Average Nitrogen and Phosphorus Fertilizer Application in Agriculture.** **a**, The annual average application of agricultural nitrogen fertilizer. **b**, The annual average application of agricultural phosphate fertilizer. Higher amounts of fertilizer application are indicated by lighter hues. Countries with the highest fertilizer usage include Brazil, China, India, and the United States. The map was created using ArcGIS.



70 **Extended Data Tab. 1 The top 30 algae bloom dominant species and main distribution countries**  
71 **in HAEDAT**

| Rank | Causative Species Name               | Major Country | count | Secondary Country | count | Total |
|------|--------------------------------------|---------------|-------|-------------------|-------|-------|
| 1    | <i>Pyrodinium bahamense</i>          | Philippines   | 665   | Malaysia          | 23    | 730   |
| 2    | <i>Dinophysis acuminata</i>          | Spain         | 153   | Portugal          | 134   | 418   |
| 3    | <i>Dinophysis spp.</i>               | France        | 201   | Spain             | 56    | 411   |
| 4    | <i>Pseudo-nitzschia spp.</i>         | France        | 88    | United States     | 60    | 239   |
| 5    | <i>Alexandrium spp.</i>              | Norway        | 76    | United States     | 68    | 235   |
| 6    | <i>Dinophysis acuta</i>              | Norway        | 62    | Portugal          | 19    | 103   |
| 7    | <i>Alexandrium catenella</i>         | United States | 68    | Chile             | 14    | 102   |
| 8    | <i>Cochlodinium polykrikoides</i>    | Korea         | 47    | United States     | 24    | 99    |
| 9    | <i>Gymnodinium catenatum</i>         | Mexico        | 26    | Portugal          | 21    | 68    |
| 10   | <i>Heterosigma akashiwo</i>          | Canada        | 38    | Japan             | 8     | 66    |
| 11   | <i>Alexandrium tamarense</i>         | Canada        | 27    | Norway            | 25    | 61    |
| 12   | <i>Pseudo-nitzschia australis</i>    | Spain         | 51    | Ireland           | 5     | 60    |
| 13   | <i>Karenia mikimotoi</i>             | Japan         | 41    | China             | 4     | 54    |
| 14   | <i>Karenia brevis</i>                | United States | 41    | Mexico            | 9     | 50    |
| 15   | <i>Gymnodinium catenatum</i>         | Portugal      | 15    | Spain             | 13    | 45    |
| 16   | <i>Pyrodinium bahamense</i>          | Philippines   | 31    | Mexico            | 12    | 45    |
| 17   | <i>Nodularia spumigena</i>           | Poland        | 24    | Sweden            | 9     | 44    |
| 18   | <i>Noctiluca scintillans</i>         | China         | 12    | Greece            | 7     | 39    |
| 19   | <i>Skeletonema costatum</i>          | France        | 18    | China             | 17    | 38    |
| 20   | <i>Alexandrium minutum</i>           | Spain         | 13    | Slovenia          | 8     | 35    |
| 21   | <i>Pseudo-nitzschia seriata</i>      | Canada        | 8     | United States     | 7     | 26    |
| 22   | <i>Prorocentrum minimum</i>          | United States | 18    | Greece            | 3     | 25    |
| 23   | <i>Alexandrium fundyense</i>         | Canada        | 12    | United States     | 8     | 23    |
| 24   | <i>Dinophysis acuminata</i>          | Portugal      | 19    | Australia         | 2     | 23    |
| 25   | <i>Dinophysis caudata</i>            | Portugal      | 11    | Slovenia          | 6     | 22    |
| 26   | <i>Margalefidinium polykrikoides</i> | Mexico        | 16    | United States     | 5     | 21    |

|    |                                    |               |    |        |   |    |
|----|------------------------------------|---------------|----|--------|---|----|
| 27 | <i>Prorocentrum spp.</i>           | China         | 19 | Mexico | 1 | 20 |
| 28 | <i>Chaetoceros spp.</i>            | France        | 14 | Japan  | 5 | 19 |
| 29 | <i>Akashiwo sanguinea</i>          | United States | 6  | Japan  | 4 | 18 |
| 30 | <i>Aureococcus anophagefferens</i> | United States | 15 | China  | 2 | 18 |

73 **Extended Data Tab. 2 The top 30 countries and their major and secondary causative species of**  
74 **blooms in HAEDAT**

| Rank | Country        | Major Causative Species                     | Count | Secondary Causative Species                 | Count | Total |
|------|----------------|---------------------------------------------|-------|---------------------------------------------|-------|-------|
| 1    | Philippines    | <i>Pyrodinium bahamense</i>                 | 665   | <i>Skeletonema sp.</i>                      | 2     | 670   |
| 2    | United States  | <i>Alexandrium catenella</i>                | 68    | <i>Pseudo-nitzschia spp.</i>                | 55    | 504   |
| 3    | France         | <i>Dinophysis spp.</i>                      | 194   | <i>Pseudo-nitzschia spp.</i>                | 88    | 419   |
| 4    | Spain          | <i>Dinophysis acuminata</i>                 | 153   | <i>Dinophysis spp.</i>                      | 56    | 402   |
| 5    | Portugal       | <i>Dinophysis acuminata</i>                 | 134   | <i>Pseudo-nitzschia spp.</i>                | 24    | 311   |
| 6    | Norway         | <i>Alexandrium spp.</i>                     | 68    | <i>Dinophysis acuta</i>                     | 62    | 235   |
| 7    | Mexico         | <i>Gymnodinium catenatum</i>                | 26    | <i>Myrionecta rubra</i>                     | 19    | 169   |
| 8    | China          | <i>Prorocentrum sp.</i>                     | 19    | <i>Skeletonema costatum</i>                 | 17    | 149   |
| 9    | Japan          | <i>Karenia mikimotoi</i>                    | 41    | <i>Chattonella spp.</i>                     | 14    | 143   |
| 10   | Canada         | <i>Heterosigma akashiwo</i>                 | 38    | <i>Alexandrium tamarense</i>                | 27    | 142   |
| 11   | United Kingdom | <i>Dinophysis spp.</i>                      | 52    | <i>Alexandrium spp.</i>                     | 37    | 113   |
| 12   | Korea          | <i>Cochlodinium polykrikoides</i>           | 47    | <i>Gonyaulax polygramma</i>                 | 7     | 107   |
| 13   | Slovenia       | <i>Dinophysis fortii</i>                    | 15    | <i>Lingulodinium polyedra</i>               | 12    | 91    |
| 14   | Sweden         | <i>Dinophysis spp.</i>                      | 29    | <i>Aphanizomenon flos-aquae</i>             | 20    | 86    |
| 15   | Poland         | <i>Nodularia spumigena</i>                  | 35    | <i>Cylindrospermopsis raciborskii</i>       | 6     | 67    |
| 16   | Ireland        | <i>Dinophysis acuminata</i>                 | 12    | <i>Dinophysis acuta</i>                     | 12    | 62    |
| 17   | Turkey         | <i>Heterosigma akashiwo</i>                 | 5     | <i>Emiliania huxleyi</i>                    | 4     | 58    |
| 18   | Uruguay        | <i>Dinophysis acuminata</i>                 | 8     | <i>Dinophysis spp.</i>                      | 5     | 43    |
| 19   | Brazil         | <i>Pseudo-nitzschia pseudodelicatissima</i> | 1     | <i>Alexandrium spp.</i>                     | 1     | 40    |
| 20   | Malaysia       | <i>Pyrodinium bahamense</i>                 | 23    | <i>Cochlodinium polykrikoides</i>           | 5     | 39    |
| 21   | Australia      | <i>Gambierdiscus spp.</i>                   | 5     | <i>Pseudo-nitzschia pseudodelicatissima</i> | 4     | 36    |
| 22   | Argentina      | <i>Alexandrium catenella</i>                | 9     | <i>Gymnodinium catenatum</i>                | 3     | 31    |
| 23   | New Zealand    | <i>Alexandrium minutum</i>                  | 2     | <i>Alexandrium catenella</i>                | 2     | 28    |
| 24   | Chile          | <i>Alexandrium catenella</i>                | 14    | <i>Chattonella verruculosa</i>              | 3     | 28    |

|    |                       |                              |   |                                 |   |    |
|----|-----------------------|------------------------------|---|---------------------------------|---|----|
| 25 | Greece                | <i>Noctiluca scintillans</i> | 7 | <i>Prorocentrum minimum</i>     | 3 | 25 |
| 26 | Denmark               | <i>Dinophysis acuminata</i>  | 6 | <i>Chattonella spp.</i>         | 5 | 23 |
| 27 | India                 | <i>Noctiluca scintillans</i> | 7 | <i>Trichodesmium erythraeum</i> | 5 | 23 |
| 28 | South Africa          | <i>Alexandrium catenella</i> | 2 | <i>Gonyaulax polygramma</i>     | 2 | 23 |
| 29 | Russian<br>Federation | <i>Heterosigma akashiwo</i>  | 3 | <i>Noctiluca scintillans</i>    | 3 | 22 |
| 30 | Peru                  | <i>Akashiwo sanguinea</i>    | 7 | <i>Alexandrium ostenfeldii</i>  | 3 | 19 |
